# Supplementary material
Source: PubMed Central journal article supplement (PMC4109771)

## Supplemental Material

### Enhanced lipid isomer separation in human plasma using reversed-phase UPLC with ion-mobility / high-resolution MS detection

Carola W.N. Damen,<sup>1,2\*</sup> Giorgis Isaac<sup>3</sup>, James Langridge<sup>4</sup>, Thomas Hankemeier,<sup>1,2</sup> Rob J. Vreeken<sup>1,2</sup>

<sup>1</sup> Netherlands Metabolomics Centre, Leiden University, P.O. Box 9502, 2300 RA Leiden, The Netherlands

<sup>2</sup> Division of Analytical Biosciences, Leiden Academic Centre for Drug Research, Leiden University, P.O. Box 9502, 2300 RA Leiden, The Netherlands

<sup>3</sup> Waters Corporation, 34 Maple Street, Milford, MA 01757, USA

<sup>4</sup> Waters Corporation, Stamford Avenue, Altrincham Road, Wilmslow, SK9 4AX, UK

\* Corresponding author:

Carola W.N. Damen

Netherlands Metabolomics Centre

Division Analytical Biosciences / LACDR

P.O. Box 9502,

2300 RA Leiden

The Netherlands

Tel. +31 (0)71-527 4321

Fax. +31 (0)71-527 4277

e-mail: [c.w.n.damen@lacdr.leidenuniv.nl](mailto:c.w.n.damen@lacdr.leidenuniv.nl)

### **Legend to Supplemental Tables:**

Table 1: Results of robustness test on CSH column with 20 min gradient. For each run 5 injections of a human plasma extract were performed.

Table 2: Results of robustness test on CSH column with 10 min gradient. For each run 5 injections of a human plasma extract were performed.

**Table 1:** Results of robustness test on CSH column with 20 min gradient. For each run 5 injections of a human plasma extract were performed.

| Compound<br>m/z<br>ion | LPC (20:4)         |              | PC (36:2)          |              | Cer (d18:1/16:0)                    |              | SM (C20)           |              | CE (20:4)                         |              | MG (20:3)           |             | DG (36:3)           |              | TG (52:1)                         |              |
|------------------------|--------------------|--------------|--------------------|--------------|-------------------------------------|--------------|--------------------|--------------|-----------------------------------|--------------|---------------------|-------------|---------------------|--------------|-----------------------------------|--------------|
|                        | 544.334            |              | 786.601            |              | 520.509                             |              | 759.637            |              | 690.618                           |              | 403.282             |             | 641.512             |              | 878.817                           |              |
|                        | [M+H] <sup>+</sup> |              | [M+H] <sup>+</sup> |              | [M-H <sub>2</sub> O+H] <sup>+</sup> |              | [M+H] <sup>+</sup> |              | [M+NH <sub>4</sub> ] <sup>+</sup> |              | [M+Na] <sup>+</sup> |             | [M+Na] <sup>+</sup> |              | [M+NH <sub>4</sub> ] <sup>+</sup> |              |
|                        | RSD                |              | RSD                |              | RSD                                 |              | RSD                |              | RSD                               |              | RSD                 |             | RSD                 |              | RSD                               |              |
|                        | Rt (min)           | (%)          | Rt (min)           | (%)          | Rt (min)                            | (%)          | Rt (min)           | (%)          | Rt (min)                          | (%)          | Rt (min)            | (%)         | Rt (min)            | (%)          | Rt (min)                          | (%)          |
| Intra-run 1            | 1.00               | 0.000        | 8.19               | 0.067        | 5.64                                | 0.385        | 9.85               | 0.144        | 15.49                             | 0.000        | 0.65                | 0.00        | 10.82               | 0.124        | 16.11                             | 0.056        |
| Intra-run 2            | 1.00               | 0.000        | 8.30               | 0.108        | 5.70                                | 0.351        | 10.00              | 0.205        | 15.52                             | 0.058        | 0.65                | 0.00        | 10.99               | 0.119        | 16.12                             | 0.068        |
| Intra-run 3            | 0.99               | 0.000        | 8.24               | 0.221        | 5.66                                | 0.237        | 9.89               | 0.143        | 15.49                             | 0.000        | 0.65                | 0.00        | 10.90               | 0.112        | 16.11                             | 0.000        |
| Intra-run 4            | 1.00               | 0.000        | 8.27               | 0.132        | 5.69                                | 0.157        | 9.95               | 0.174        | 15.50                             | 0.000        | 0.65                | 0.00        | 10.97               | 0.122        | 16.11                             | 0.000        |
| Intra-run 5            | 1.00               | 0.000        | 8.24               | 0.054        | 5.68                                | 0.193        | 9.91               | 0.111        | 15.49                             | 0.035        | 0.65                | 0.00        | 10.93               | 0.000        | 16.11                             | 0.000        |
| Intra-run 6            | 1.00               | 0.000        | 8.32               | 0.000        | 5.71                                | 0.096        | 10.02              | 0.109        | 15.50                             | 0.058        | 0.65                | 0.00        | 11.05               | 0.181        | 16.11                             | 0.000        |
| <b>Inter-run</b>       | <b>1.00</b>        | <b>0.380</b> | <b>8.26</b>        | <b>0.564</b> | <b>5.68</b>                         | <b>0.498</b> | <b>9.94</b>        | <b>0.622</b> | <b>15.50</b>                      | <b>0.069</b> | <b>0.65</b>         | <b>0.00</b> | <b>10.94</b>        | <b>0.673</b> | <b>16.11</b>                      | <b>0.045</b> |

**Table 1 (continued)**

| Compound<br>m/z<br>ion | FA arachidonic acid (20:4) |              | LPE (20:1)         |              | PE (40:3)          |              | PI( 34:1)          |              | PG (34:1)          |              | ST d18:1/20:0      |              | HexCer (d18:1/16:0) |          |
|------------------------|----------------------------|--------------|--------------------|--------------|--------------------|--------------|--------------------|--------------|--------------------|--------------|--------------------|--------------|---------------------|----------|
|                        | 303.233                    |              | 506.325            |              | 796.586            |              | 835.53             |              | 747.518            |              | 834.5770           |              | 698.5576            |          |
|                        | [M-H] <sup>-</sup>         |              | [M-H] <sup>-</sup> |              | [M-H] <sup>-</sup> |              | [M-H] <sup>-</sup> |              | [M-H] <sup>-</sup> |              | [M-H] <sup>-</sup> |              | [M-H] <sup>-</sup>  |          |
|                        | RSD                        |              | RSD                |              | RSD                |              | RSD                |              | RSD                |              | RSD                |              | Rt                  | RSD      |
|                        | Rt (min)                   | (%)          | Rt (min)           | (%)          | Rt (min)           | (%)          | Rt (min)           | (%)          | Rt (min)           | (%)          | Rt (min)           | (%)          | (min)               | (%)      |
| Intra-run 1            | 1.89                       | 0.000        | 1.27               | 0.000        | 8.93               | 0.218        | 5.91               | 0.000        | 5.58               | 0.196        | 6.19               | 0.000        | 7.70                | 0.071    |
| Intra-run 2            | 1.89                       | 0.000        | 1.27               | 0.000        | 8.94               | 0.158        | 5.92               | 0.076        | 5.58               | 0.098        | 6.20               | 0.088        | 7.71                | 0.071    |
| Intra-run 3            | 1.89                       | 0.290        | 1.27               | 0.000        | 8.82               | 0.000        | 5.85               | 0.187        | 5.53               | 0.198        | 6.12               | 0.146        | 7.61                | 0.186    |
| Intra-run 4            | 1.88                       | 0.000        | 1.27               | 0.000        | 8.86               | 0.050        | 5.86               | 0.143        | 5.55               | 0.197        | 6.16               | 0.267        | 7.65                | 0.215    |
| Intra-run 5            | 1.89                       | 0.000        | 1.27               | 0.000        | 8.87               | 0.000        | 5.87               | 0.076        | 5.54               | 0.302        | 6.17               | 0.000        | 7.65                | 0.175    |
| Intra-run 6            | 1.89                       | 0.000        | 1.27               | 0.000        | 8.96               | 0.200        | 5.92               | 0.076        | 5.62               | 0.195        | 6.22               | 0.227        | 7.73                | 0.216    |
| <b>Inter-run</b>       | <b>1.89</b>                | <b>0.228</b> | <b>1.27</b>        | <b>0.000</b> | <b>8.90</b>        | <b>0.582</b> | <b>5.89</b>        | <b>0.507</b> | <b>5.57</b>        | <b>0.580</b> | <b>6.18</b>        | <b>0.523</b> | <b>7.68</b>         | <b>9</b> |

**Table 2:** Results of robustness test on CSH column with 10 min gradient. For each run 5 injections of a human plasma extract were performed.

| Compound<br>m/z<br>ion | LPC (20:4)         |              | PC (36:2)          |              | Cer (d18:1/16:0)                    |              | SM (C20)           |              | CE (20:4)                         |              | MG (20:3)           |             | DG (36:3)           |              | TG (52:1)                         |              |
|------------------------|--------------------|--------------|--------------------|--------------|-------------------------------------|--------------|--------------------|--------------|-----------------------------------|--------------|---------------------|-------------|---------------------|--------------|-----------------------------------|--------------|
|                        | 544.334            |              | 786.601            |              | 520.509                             |              | 759.637            |              | 690.618                           |              | 403.282             |             | 641.512             |              | 878.817                           |              |
|                        | [M+H] <sup>+</sup> |              | [M+H] <sup>+</sup> |              | [M-H <sub>2</sub> O+H] <sup>+</sup> |              | [M+H] <sup>+</sup> |              | [M+NH <sub>4</sub> ] <sup>+</sup> |              | [M+Na] <sup>+</sup> |             | [M+Na] <sup>+</sup> |              | [M+NH <sub>4</sub> ] <sup>+</sup> |              |
|                        | Rt (min)           | RSD (%)      | Rt (min)           | RSD (%)      | Rt (min)                            | RSD (%)      | Rt (min)           | RSD (%)      | Rt (min)                          | RSD (%)      | Rt (min)            | RSD (%)     | Rt (min)            | RSD (%)      | Rt (min)                          | RSD (%)      |
| Intra-run 1            | 0.99               | 0.000        | 6.75               | 0.000        | 4.93                                | 0.000        | 7.10               | 0.000        | 8.72                              | 0.000        | 0.65                | 0.00        | 7.20                | 0.000        | 8.94                              | 0.000        |
| Intra-run 2            | 0.99               | 0.451        | 6.75               | 0.000        | 4.93                                | 0.181        | 7.10               | 0.000        | 8.72                              | 0.000        | 0.65                | 0.00        | 7.20                | 0.000        | 8.94                              | 0.000        |
| Intra-run 3            | 0.99               | 0.000        | 6.79               | 0.000        | 4.89                                | 0.204        | 7.08               | 0.000        | 8.72                              | 0.000        | 0.65                | 0.00        | 7.20                | 0.000        | 8.92                              | 0.000        |
| Intra-run 4            | 0.99               | 0.000        | 6.79               | 0.000        | 4.89                                | 0.091        | 7.08               | 0.000        | 8.72                              | 0.000        | 0.65                | 0.00        | 7.20                | 0.000        | 8.92                              | 0.000        |
| Intra-run 5            | 0.99               | 0.000        | 6.79               | 0.000        | 4.89                                | 0.145        | 7.08               | 0.000        | 8.72                              | 0.000        | 0.65                | 0.00        | 7.20                | 0.000        | 8.92                              | 0.000        |
| Intra-run 6            | 1.00               | 0.000        | 6.80               | 0.081        | 4.93                                | 0.000        | 7.10               | 0.000        | 8.72                              | 0.000        | 0.65                | 0.00        | 7.20                | 0.000        | 8.93                              | 0.123        |
| <b>Inter-run</b>       | <b>0.99</b>        | <b>0.410</b> | <b>6.78</b>        | <b>0.318</b> | <b>4.91</b>                         | <b>0.439</b> | <b>7.09</b>        | <b>0.143</b> | <b>8.72</b>                       | <b>0.000</b> | <b>0.65</b>         | <b>0.00</b> | <b>7.20</b>         | <b>0.000</b> | <b>8.93</b>                       | <b>0.113</b> |

**Table 2 (continued)**

| Compound<br>m/z<br>ion | FA arachidonic acid (20:4) |              | LPE (20:1)         |              | PE (40:3)          |              | PI (34:1)          |              | PG (34:1)          |              | ST d18:1/20:0      |              | HexCer (d18:1/16:0) |              |
|------------------------|----------------------------|--------------|--------------------|--------------|--------------------|--------------|--------------------|--------------|--------------------|--------------|--------------------|--------------|---------------------|--------------|
|                        | 303.233                    |              | 506.325            |              | 796.586            |              | 835.53             |              | 747.518            |              | 834.5770           |              | 698.5576            |              |
|                        | [M-H] <sup>-</sup>         |              | [M-H] <sup>-</sup> |              | [M-H] <sup>-</sup> |              | [M-H] <sup>-</sup> |              | [M-H] <sup>-</sup> |              | [M-H] <sup>-</sup> |              | [M-H] <sup>-</sup>  |              |
|                        | Rt (min)                   | RSD (%)      | Rt (min)           | RSD (%)      | Rt (min)           | RSD (%)      | Rt (min)           | RSD (%)      | Rt (min)           | RSD (%)      | Rt (min)           | RSD (%)      | Rt (min)            | RSD (%)      |
| Intra-run 1            | 1.81                       | 0.000        | 1.25               | 0.000        | 6.92               | 0.000        | 5.06               | 0.000        | 4.68               | 0.096        | 5.30               | 0.103        | 6.58                | 0.204        |
| Intra-run 2            | 1.81                       | 0.000        | 1.27               | 0.000        | 6.92               | 0.000        | 5.06               | 0.000        | 4.68               | 0.096        | 5.31               | 0.084        | 6.57                | 0.136        |
| Intra-run 3            | 1.80                       | 0.000        | 1.25               | 0.000        | 6.90               | 0.000        | 5.01               | 0.000        | 4.62               | 0.362        | 5.25               | 0.209        | 6.51                | 0.168        |
| Intra-run 4            | 1.80                       | 0.000        | 1.25               | 0.000        | 6.90               | 0.130        | 5.01               | 0.000        | 4.64               | 0.236        | 5.27               | 0.208        | 6.53                | 0.168        |
| Intra-run 5            | 1.80                       | 0.248        | 1.25               | 0.000        | 6.92               | 0.000        | 5.03               | 0.178        | 4.63               | 0.361        | 5.28               | 0.085        | 6.53                | 0.306        |
| Intra-run 6            | 1.81                       | 0.000        | 1.27               | 0.000        | 6.92               | 0.000        | 5.06               | 0.000        | 4.69               | 0.191        | 5.33               | 0.308        | 6.59                | 0.166        |
| <b>Inter-run</b>       | <b>1.81</b>                | <b>0.281</b> | <b>1.26</b>        | <b>0.763</b> | <b>6.91</b>        | <b>0.135</b> | <b>5.04</b>        | <b>0.468</b> | <b>4.66</b>        | <b>0.612</b> | <b>5.29</b>        | <b>0.540</b> | <b>6.55</b>         | <b>0.515</b> |

### **Legend to Supplemental Figures.**

Figure 1: Mobilogram of the mobility separation of PC 18:1(9Z)/18:1(9Z) (red line) and PC 18:1(6Z)/18:1(6Z) (green line). The CCS values for these lipids are 302.8 and 305.6  $\text{Å}^2$ , respectively.

Figure 2: XIC for a Porcine brain extract (Avanti Lipids) for PC36:2 ( $[\text{M}+\text{H}]^+$   $m/z$  786.6007 with 0.05 Da extraction window). Clearly 3 peaks are visible. Peaks with Rt 7.74 and 8.49 min are PC 18:1/18:1 and show reasonable resemblance in terms of Rt and CCS compared to the standards PC 18:1(9Z)/18:1(9Z) was PC 18:1(6Z)/18:1(6Z), respectively. The peak with Rt 8.03 min is either PC 18:0/18:2 or PC 18:2/18:0.

Figure 3: Spectrum of a human plasma sample at retention time 7.66 min ( $\pm$  0.08 min) of low (A) and elevated (B) energy spectra without mobility data used and the same low (C) and elevated energy (D) spectra using the mobility data making structural elucidation possible.

Figure 1: Mobilogram of the mobility separation of PC 18:1(9Z)/18:1(9Z) (red line) and PC 18:1(6Z)/18:1(6Z) (green line). The CCS values for these lipids are 302.8 and 305.6  $\text{\AA}^2$ , respectively.

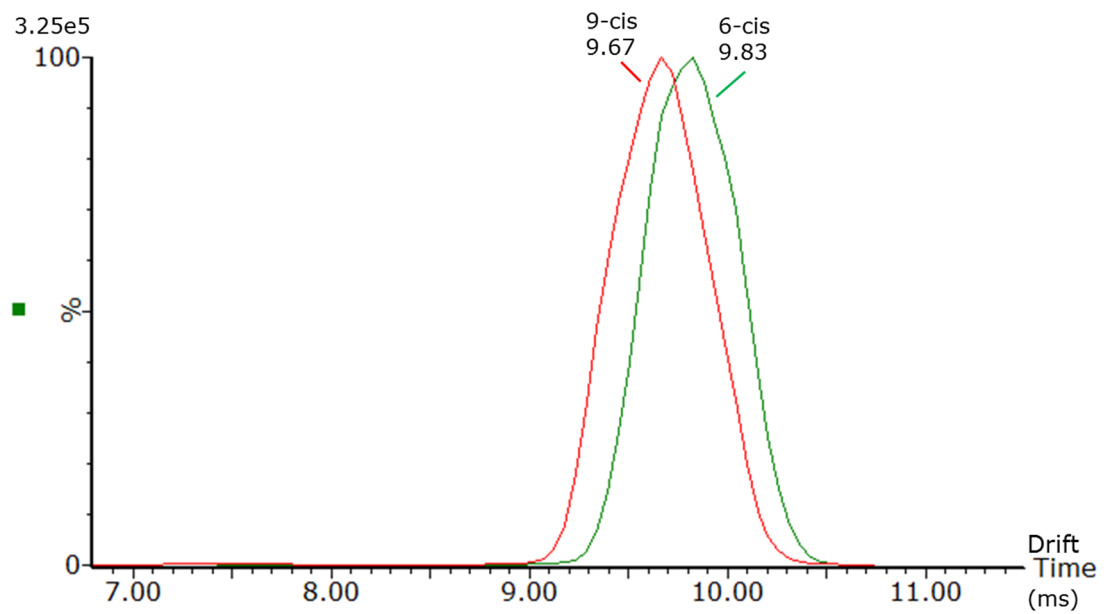

Figure 2: XIC for a Porcine brain extract (Avanti Lipids) for PC36:2 ( $[M+H]^+$   $m/z$  786.6007 with 0.05 Da extraction window). Clearly 3 peaks are visible. Peaks with Rt 7.74 and 8.49 min are PC 18:1/18:1 and show reasonable resemblance in terms of Rt and CCS compared to the standards PC 18:1(9Z)/18:1(9Z) was PC 18:1(6Z)/18:1(6Z), respectively. The peak with Rt 8.03 min is either PC 18:0/18:2 or PC 18:2/18:0.

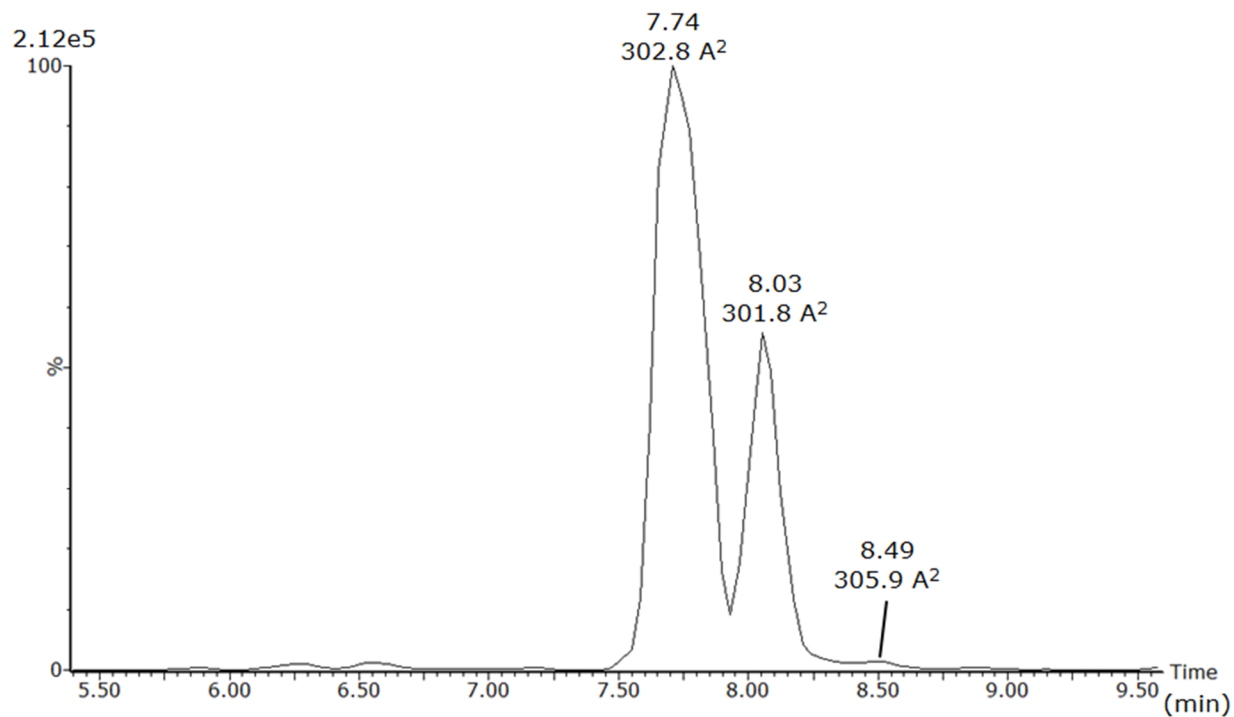

Figure 3: Spectrum of a human plasma sample at retention time 7.66 min (+/- 0.08 min) of low (A) and elevated (B) energy spectra without mobility data used and the same low (C) and elevated energy (D) spectra using the mobility data making structural elucidation possible.

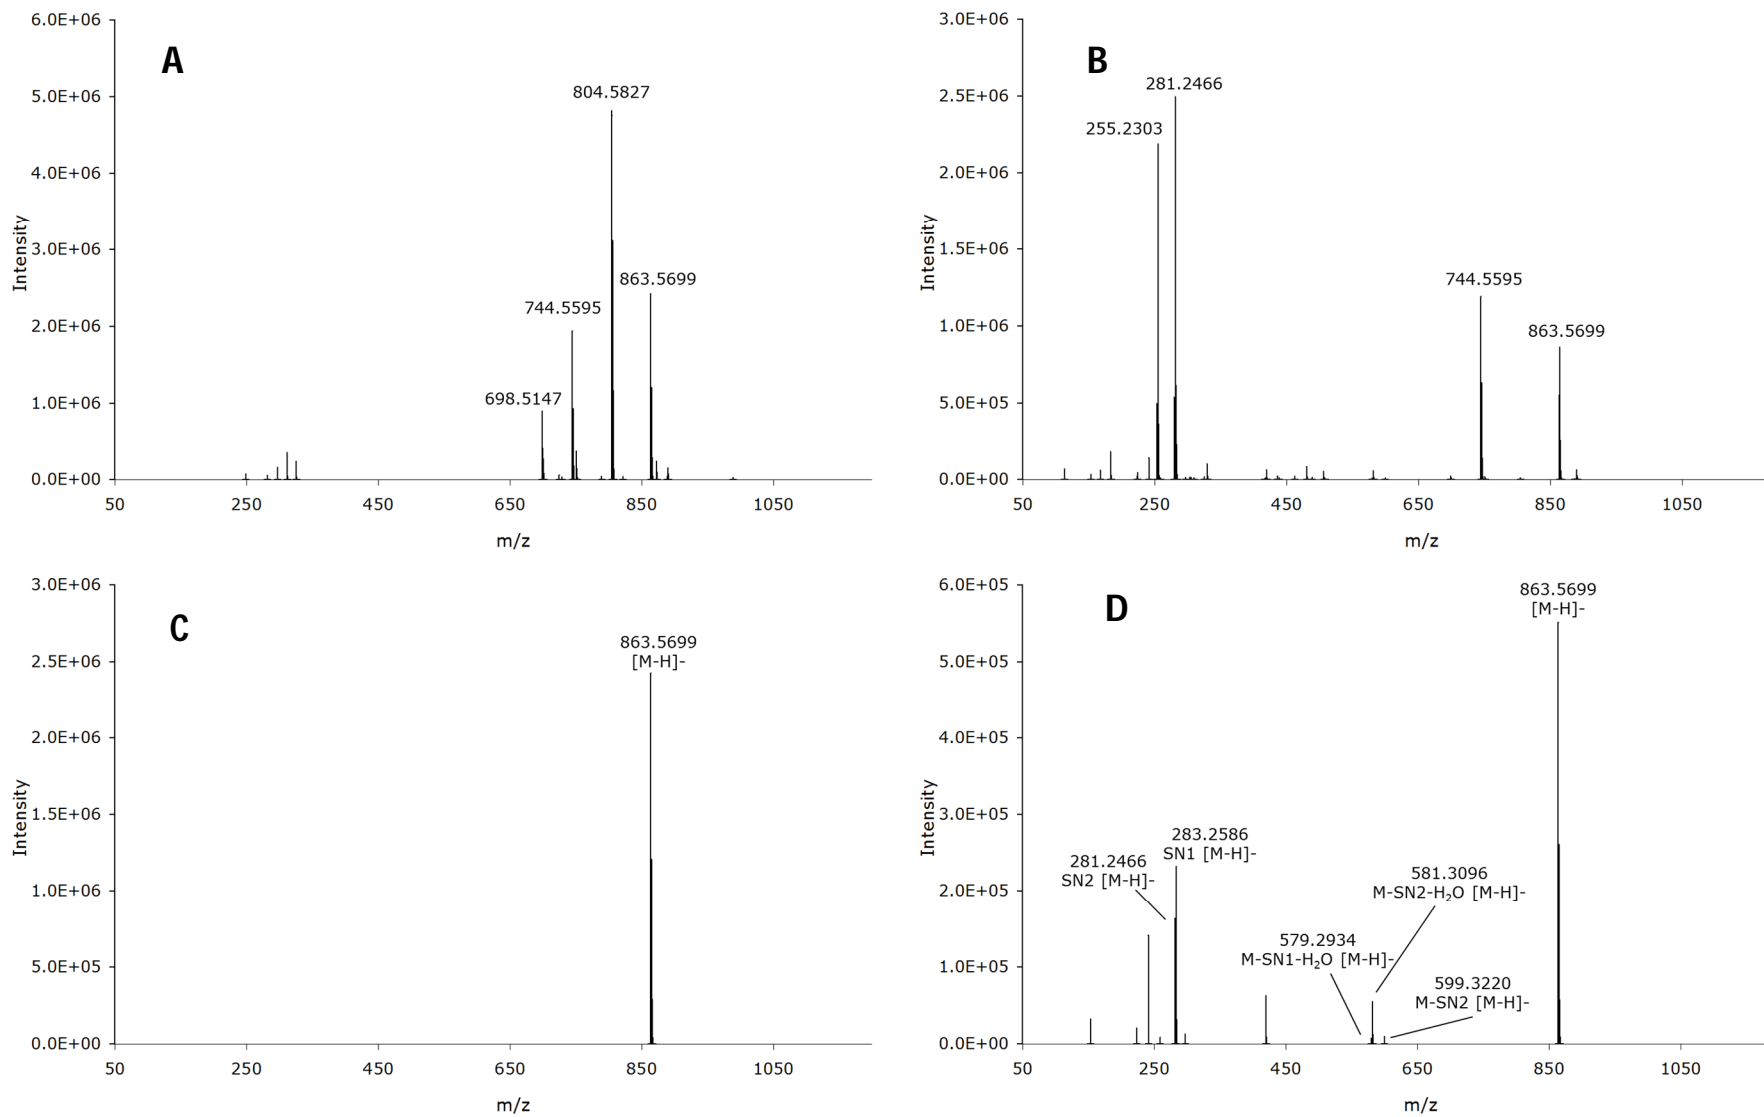

Supplement: supp_D047795_jlr.D047795-1.pdf [file supp_D047795_jlr.D047795-1.pdf]
